# Supplementary material
Source: MDPI journal article supplement (https://www.mdpi.com/2073-4433/12/12/1549)
Supplement: s1 [file s1]

# Supplementary Materials: Has Covid-19 lockdown affected on air quality? – different time scale case study in Wrocław, Poland

Tomasz Turek <sup>1</sup>, Ewa Diakowska<sup>1</sup> and Joanna A. Kamińska <sup>1\*</sup>

**Table S1.** Number of confirmed cases of infection with COVID-19 disease in Poland in the period 10<sup>th</sup> March to 30<sup>th</sup> May 2020.

| Date       | Number of new cases | Total number of cases | Date       | Number of new cases | Total number of cases |
|------------|---------------------|-----------------------|------------|---------------------|-----------------------|
| 10.03.2020 | 5                   | 22                    | 20.04.2020 | 306                 | 9593                  |
| 11.03.2020 | 9                   | 31                    | 21.04.2020 | 263                 | 9856                  |
| 12.03.2020 | 20                  | 51                    | 22.04.2020 | 313                 | 10169                 |
| 13.03.2020 | 17                  | 68                    | 23.04.2020 | 342                 | 10511                 |
| 14.03.2020 | 35                  | 103                   | 24.04.2020 | 381                 | 10892                 |
| 15.03.2020 | 21                  | 124                   | 25.04.2020 | 381                 | 11273                 |
| 16.03.2020 | 52                  | 176                   | 26.04.2020 | 344                 | 11617                 |
| 17.03.2020 | 61                  | 237                   | 27.04.2020 | 285                 | 11902                 |
| 18.03.2020 | 48                  | 285                   | 28.04.2020 | 316                 | 12218                 |
| 19.03.2020 | 68                  | 353                   | 29.04.2020 | 422                 | 12640                 |
| 20.03.2020 | 70                  | 423                   | 30.04.2020 | 237                 | 12877                 |
| 21.03.2020 | 111                 | 534                   | 01.05.2020 | 228                 | 13105                 |
| 22.03.2020 | 99                  | 633                   | 02.05.2020 | 270                 | 13375                 |
| 23.03.2020 | 115                 | 748                   | 03.05.2020 | 318                 | 13693                 |
| 24.03.2020 | 152                 | 900                   | 04.05.2020 | 313                 | 14006                 |
| 25.03.2020 | 151                 | 1051                  | 05.05.2020 | 425                 | 14431                 |
| 26.03.2020 | 170                 | 1221                  | 06.05.2020 | 309                 | 14740                 |
| 27.03.2020 | 168                 | 1389                  | 07.05.2020 | 307                 | 15047                 |
| 28.03.2020 | 249                 | 1638                  | 08.05.2020 | 319                 | 15366                 |
| 29.03.2020 | 224                 | 1862                  | 09.05.2020 | 285                 | 15651                 |
| 30.03.2020 | 193                 | 2055                  | 10.05.2020 | 345                 | 15996                 |
| 31.03.2020 | 256                 | 2311                  | 11.05.2020 | 330                 | 16326                 |
| 01.04.2020 | 243                 | 2554                  | 12.05.2020 | 595                 | 16921                 |
| 02.04.2020 | 392                 | 2946                  | 13.05.2020 | 283                 | 17204                 |
| 03.04.2020 | 437                 | 3383                  | 14.05.2020 | 411                 | 17615                 |
| 04.04.2020 | 244                 | 3627                  | 15.05.2020 | 401                 | 18016                 |
| 05.04.2020 | 475                 | 4102                  | 16.05.2020 | 241                 | 18257                 |
| 06.04.2020 | 311                 | 4413                  | 17.05.2020 | 272                 | 18529                 |
| 07.04.2020 | 435                 | 4848                  | 18.05.2020 | 356                 | 18885                 |
| 08.04.2020 | 356                 | 5204                  | 19.05.2020 | 383                 | 19268                 |
| 09.04.2020 | 370                 | 5574                  | 20.05.2020 | 471                 | 19739                 |
| 10.04.2020 | 380                 | 5954                  | 21.05.2020 | 404                 | 20143                 |
| 11.04.2020 | 401                 | 6355                  | 22.05.2020 | 476                 | 20619                 |
| 12.04.2020 | 318                 | 6673                  | 23.05.2020 | 312                 | 20931                 |
| 13.04.2020 | 260                 | 6933                  | 24.05.2020 | 395                 | 21326                 |
| 14.04.2020 | 269                 | 7202                  | 25.05.2020 | 305                 | 21631                 |

|            |     |      |            |     |       |
|------------|-----|------|------------|-----|-------|
| 15.04.2020 | 380 | 7582 | 26.05.2020 | 443 | 22074 |
| 16.04.2020 | 336 | 7918 | 27.05.2020 | 399 | 22473 |
| 17.04.2020 | 461 | 8379 | 28.05.2020 | 352 | 22825 |
| 18.04.2020 | 363 | 8742 | 29.05.2020 | 330 | 23155 |
| 19.04.2020 | 545 | 9287 | 30.05.2020 | 416 | 23571 |
| 20.04.2020 | 306 | 9593 | 31.05.2020 | 215 | 23786 |

**Table S2.** Descriptive statistics for traffic flow [veh] during each year of reference period (10 March to 30 May 2016-2019).

| Year | Min | Median | Average     | Max  |
|------|-----|--------|-------------|------|
| 2016 | 7   | 3141   | 2771 (1818) | 5607 |
| 2017 | 102 | 3142   | 2717 (1787) | 5425 |
| 2018 | 0   | 3158   | 2777 (1814) | 5403 |
| 2019 | 127 | 3266   | 2811 (1817) | 5809 |

In brackets (standard deviation)

**Table S3.** Descriptive statistics for meteorological conditions during each year of reference period (10 March to 30 May 2016-2019).

|                            | Year | Min   | Median | Average       | Max    |
|----------------------------|------|-------|--------|---------------|--------|
| Air temperature [°C]       | 2016 | -4.6  | 9.9    | 10.7 (5.99)   | 28.0   |
|                            | 2017 | -2.6  | 10.2   | 10.7 (5.76)   | 31.0   |
|                            | 2018 | -7.9  | 13.1   | 12.4 (7.91)   | 29.8   |
|                            | 2019 | -2.8  | 10.2   | 10.7 (5.42)   | 28.2   |
| Wind speed [m/s]           | 2016 | 0     | 3      | 3.08 (1.79)   | 10     |
|                            | 2017 | 0     | 3      | 3.10 (1.84)   | 11     |
|                            | 2018 | 0     | 3      | 3.29 (2.05)   | 11     |
|                            | 2019 | 0     | 3      | 3.31 (2.21)   | 12     |
| Wind direction [deg]       | 2016 | 0     | 248    | 207 (103)     | 360    |
|                            | 2017 | 0     | 259    | 209 (109)     | 360    |
|                            | 2018 | 0     | 140    | 168 (102)     | 360    |
|                            | 2019 | 0     | 235    | 196 (110)     | 360    |
| Relative humidity [%]      | 2016 | 30    | 76     | 73 (17.2)     | 99     |
|                            | 2017 | 31    | 75     | 71 (17.6)     | 98     |
|                            | 2018 | 25    | 67     | 65 (17.9)     | 98     |
|                            | 2019 | 22    | 66     | 66 (19.2)     | 97     |
| Water vapor pressure [hPa] | 2016 | 3.8   | 8.7    | 9.39 (3.06)   | 22.0   |
|                            | 2017 | 3.5   | 8.8    | 9.23 (2.98)   | 21.6   |
|                            | 2018 | 1.9   | 9.5    | 9.62 (3.60)   | 20.0   |
|                            | 2019 | 3.2   | 7.8    | 8.46 (2.91)   | 17.3   |
| Air pressure [hPa]         | 2016 | 990.7 | 999.6  | 1000.3 (7.36) | 1020.2 |
|                            | 2017 | 990.2 | 1003.8 | 1003.4 (6.61) | 1017.9 |
|                            | 2018 | 987.3 | 998.7  | 999.4 (7.47)  | 1018.5 |
|                            | 2019 | 983.9 | 999.8  | 1001.3 (9.31) | 1020.3 |

In brackets (standard deviation)

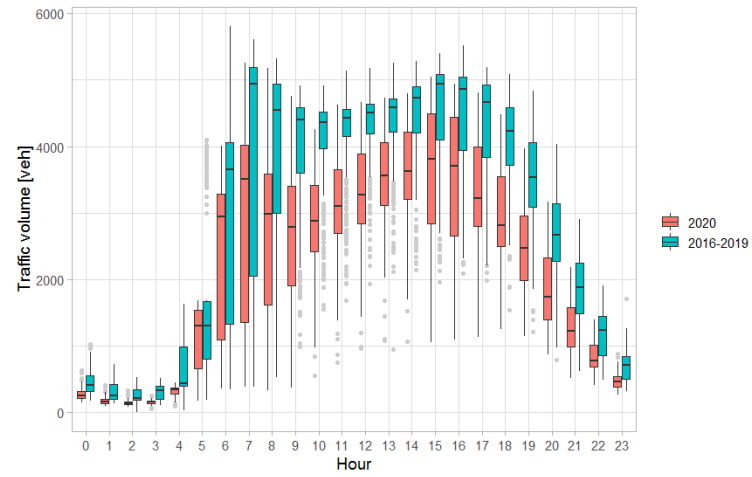

**Figure S1.** Traffic volume hourly variability in 10<sup>th</sup> March to 30<sup>th</sup> May: 2020 and 2016-2019.

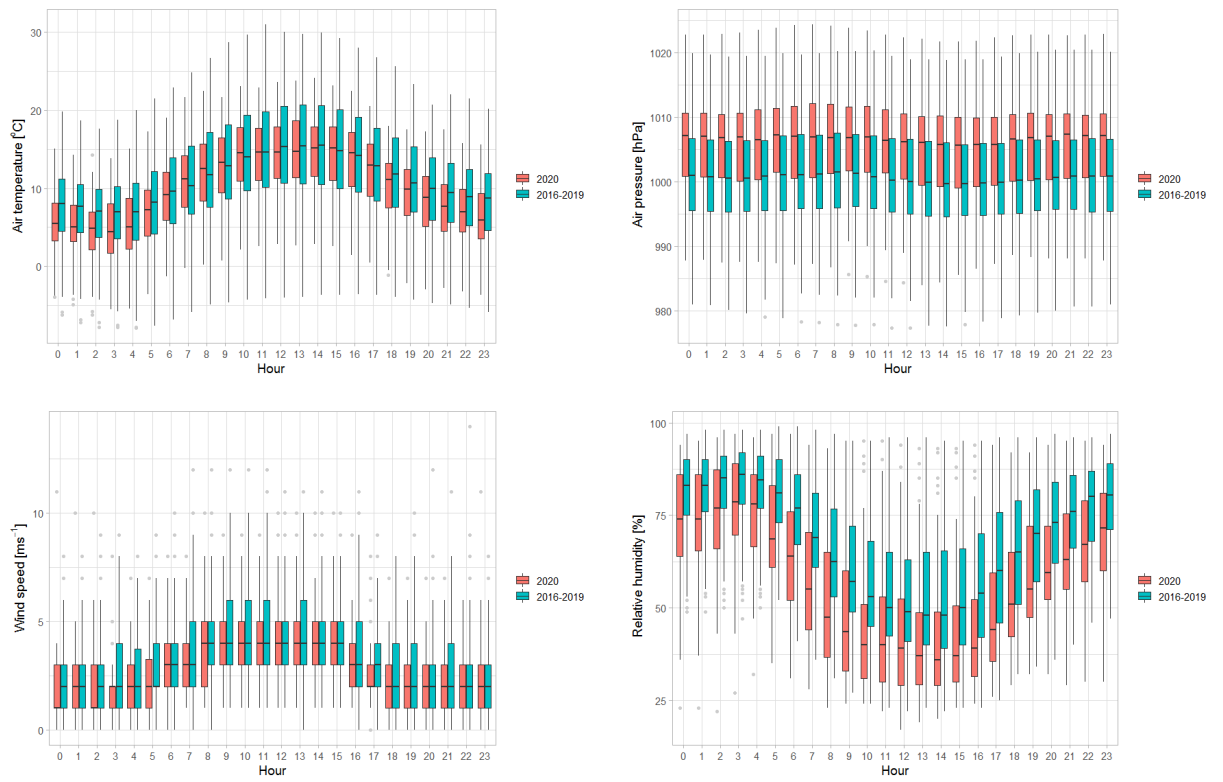

**Figure S2.** Meteorological conditions hourly variability on 10<sup>th</sup> March to 30<sup>th</sup> May: 2020 and 2016-2019.
